# Supplementary material for: Antagonistic Functions of Androgen Receptor and NF-κB in Prostate Cancer—Experimental and Computational Analyses
Source: MDPI journal article supplement (doi:10.3390/cancers14246164), 2022-12-14
Supplement: s1 [file s1]

# Supplementary Materials: Antagonistic Functions of Androgen Receptor and NF- $\kappa$ B in Prostate Cancer—Experimental and Computational Analyses

José Basílio, Bernhard Hochreiter, Bastian Hoesel, Emira Sheshori, Marion Mussbacher, Rudolf Hanel and Johannes A. Schmid <sup>1,\*</sup>

## 1. Supplementary methods:

### 1.1. RNA extraction and qPCR analysis

RNA was isolated using Qiazol reagent (Qiagen), according to the manufacturer's instructions. For qPCR analysis cDNA was generated using RevertAid First Strand cDNA synthesis Kit (Thermo Scientific) according to the manufacturer's instructions. qPCR was performed using SYBR Green (Thermo Scientific) or TaqMan Reagents (Thermo Scientific). Primers for qPCR analysis were as follows:

c-myc\_for: AGCGACTCTGAGGAGGAACA,  
c-myc\_rev: CTCTGA-CCTTTTGCCAGGAG,  
GAPDH\_for: CCTGTTCGACAGTCAGCCG,  
GAPDH\_rev: CGACCAAATCCGTTGACTCC,  
cxcl5\_for: ATTTTGGACGGTGGAACAA,  
cxcl5\_rev: TGTCTTCCCTGGGTTTCAGAG,  
cxcl12\_for: TCAGCCTGAGCTACAGAT-GC,  
cxcl12\_rev: CTTTAGCTTCGGGTCAATGC,  
AR\_for: GTGGAAGCTGCAAGGT-CTTC,  
AR\_rev: GGCGCACAGGTACTTCTGTT,  
ERG\_for: CAAGTAGCCGCCT-TGCAAA,  
ERG\_rev: GCTCCAGGAGGAACTGCCA,  
ERG\_probe: FAM-CCAGGCAGTGCCAGATCCAGC-TAMRA,

## 2. Supplementary figures:

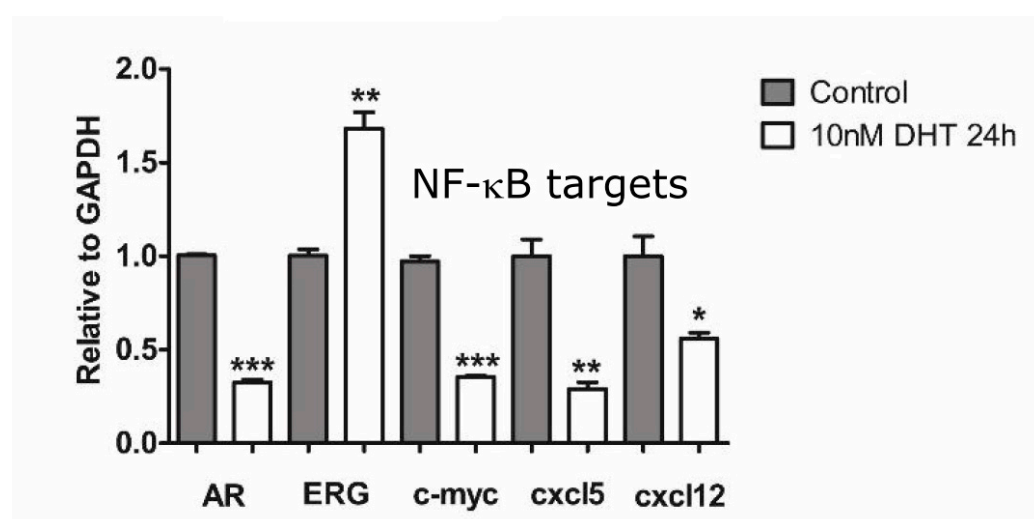

**Figure S1.** Quantitative PCR analysis of mRNA expression after DHT treatment. VCaP cells (which contain a gene fusion placing the Ets related gene ERG downstream of the androgen-dependent TMPRSS2 promoter) were treated with dihydro-testosterone (DHT) for 24h, followed by RNA extraction and quantitative RT-PCR. This revealed a downregulation of known NF- $\kappa$ B target genes (c-myc, cxcl5 and cxcl12) after DHT-treatment, as well as a reduction of the AR mRNA itself (implying

a negative feedback loop), while ERG expression was upregulated. ( $n = 3$ , error bars represent SEM,  $*p < 0.05$ ;  $**p < 0.01$ ,  $***p < 0.001$ ).

A

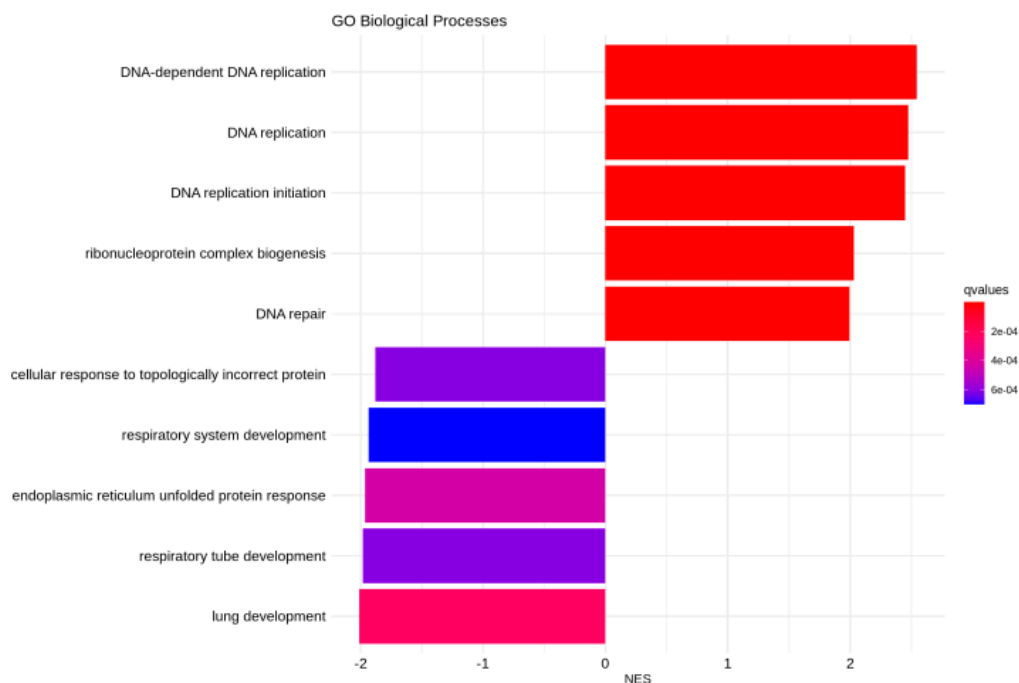

B

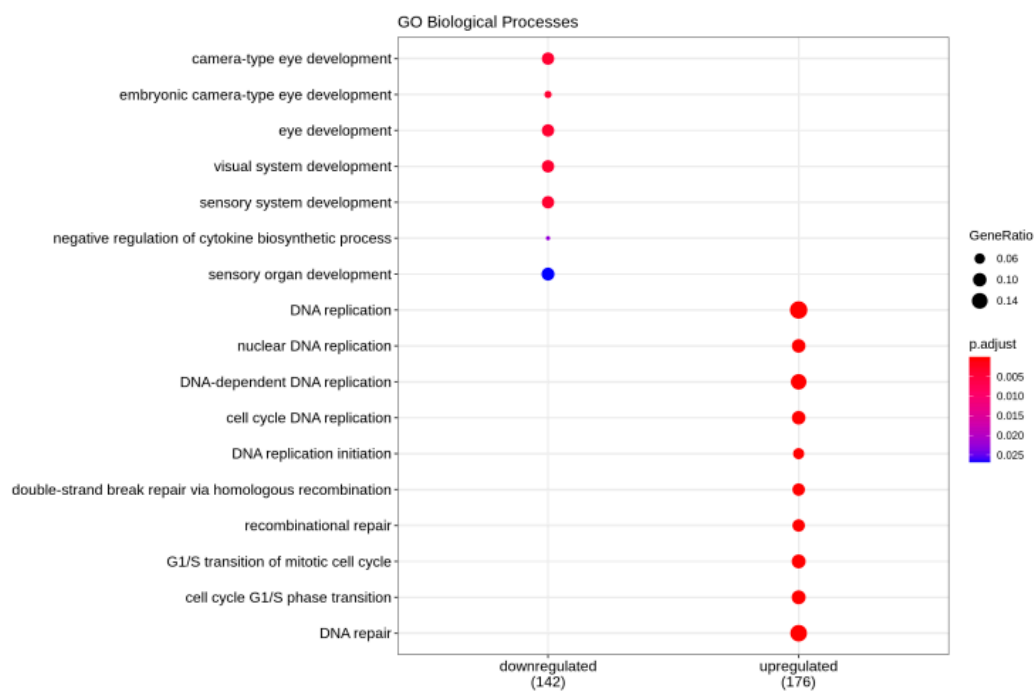

**Figure S2.** Computational analysis of VCaP cells treated with bicalutamide (GSE62473). (A) Gene set enrichment analysis: most significant Gene Ontology/Biological Processes; (B) Over-representation analysis (ORA) of the most significant biological processes.

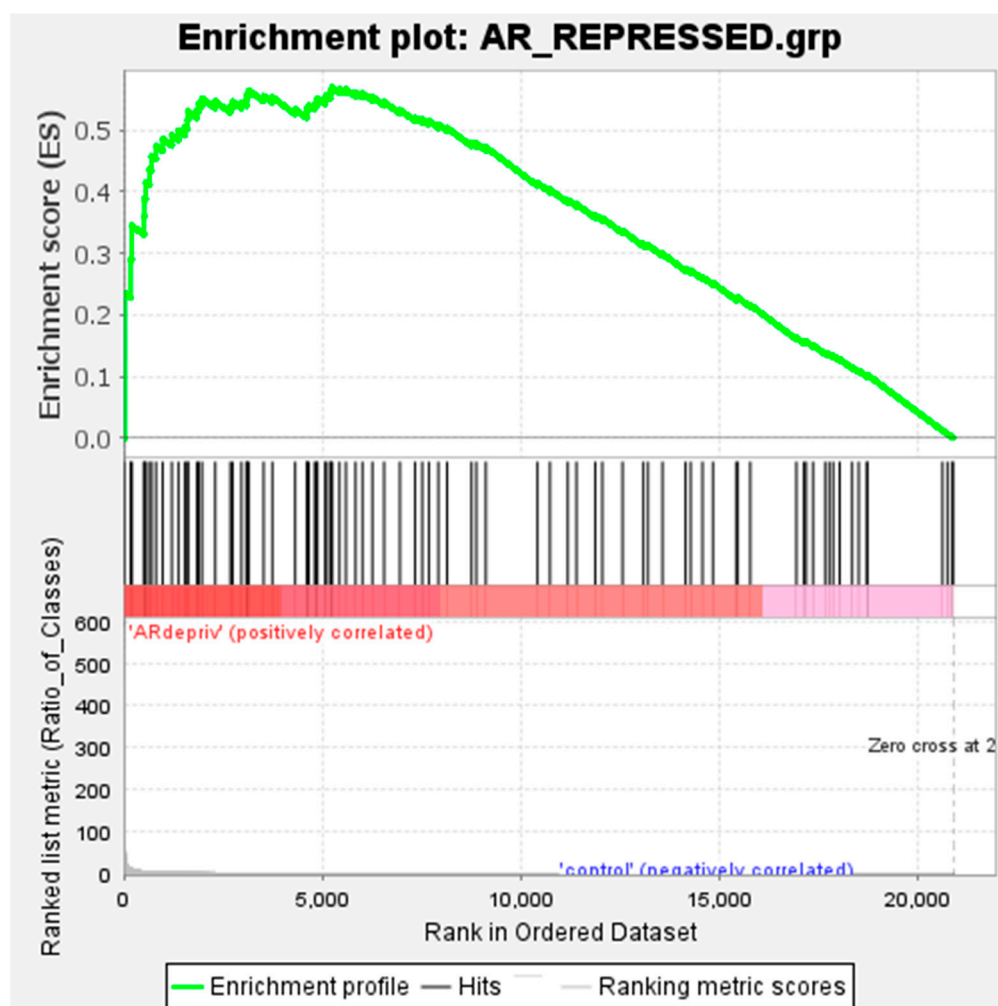

**Figure S3.** Gene set enrichment analysis (GSEA) of LNCaPs androgen-deprived for 5 months. Gene set GSE8702 was analyzed (2 samples of 5 months deprivation versus 2 controls: 0 and 3 weeks) using the GSEA software of the Broad Institute with a gene set of AR-repressed genes published in [46] Mulholland DJ, et al., Cancer Cell 2011, Vol. 19: 792-804, <https://doi.org/10.1016/j.ccr.2011.05.006>. Genes repressed by AR are enriched with a normalized enrichment score (NES) of 1.65.

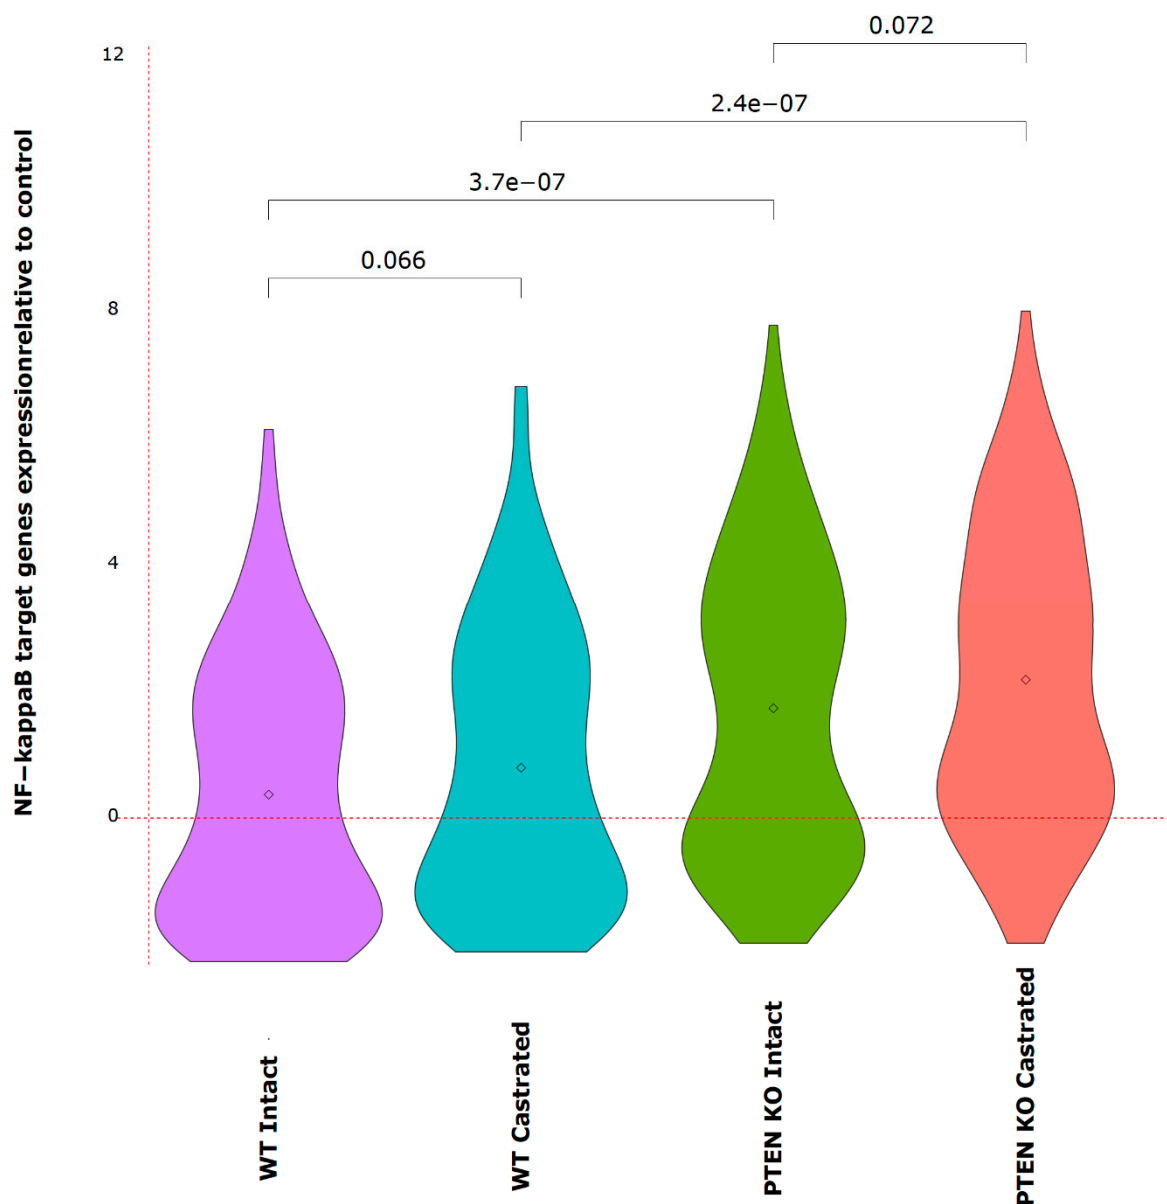

**Figure S4.** Increase of NFκB target gene expression by loss of androgen and of PTEN function. The dataset GSE24691 [29] (Carver et al. *Cancer Cell* 2011; <https://doi.org/10.1016/j.ccr.2011.04.008>) of wild-type (WT) and prostate-specific PTEN-knockout mice (PTEN KO) comprising the whole prostate including epithelial and stromal cells was analyzed for the expression of NFκB target genes (Suppl. Table 1, derived from [30] Birbach et al. *Neoplasia* 2011; <https://doi.org/10.1593/neo.11524>). Mice of the 2 genotypes were either left untreated or castrated and analyzed 3 days afterwards. Androgen ablation by castration led to an upregulation of NFκB target genes – and the same was observed after loss of PTEN. The highest upregulation was observed in castrated PTEN-KO mice. Bars linking the violin plots indicate the p-values of significance of the differences.

LNCaP p65.

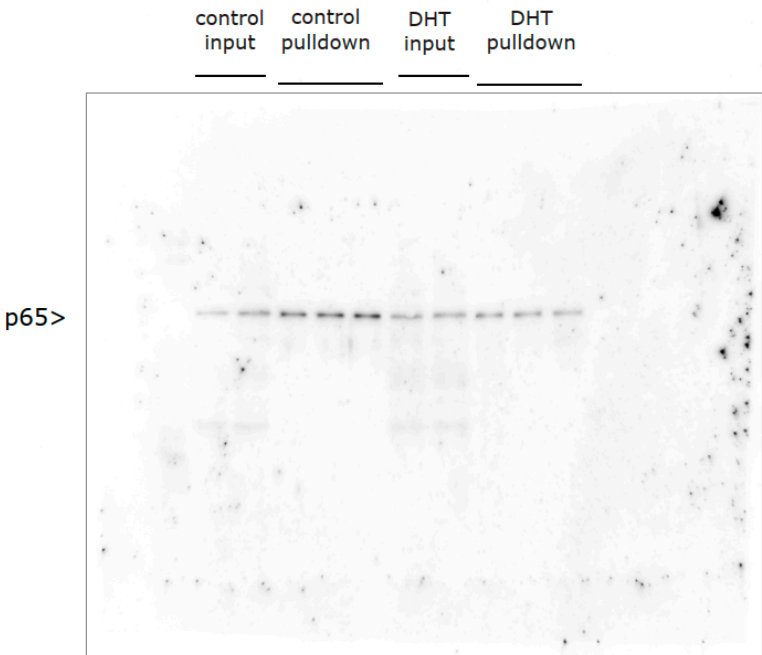

LNCaP p50.

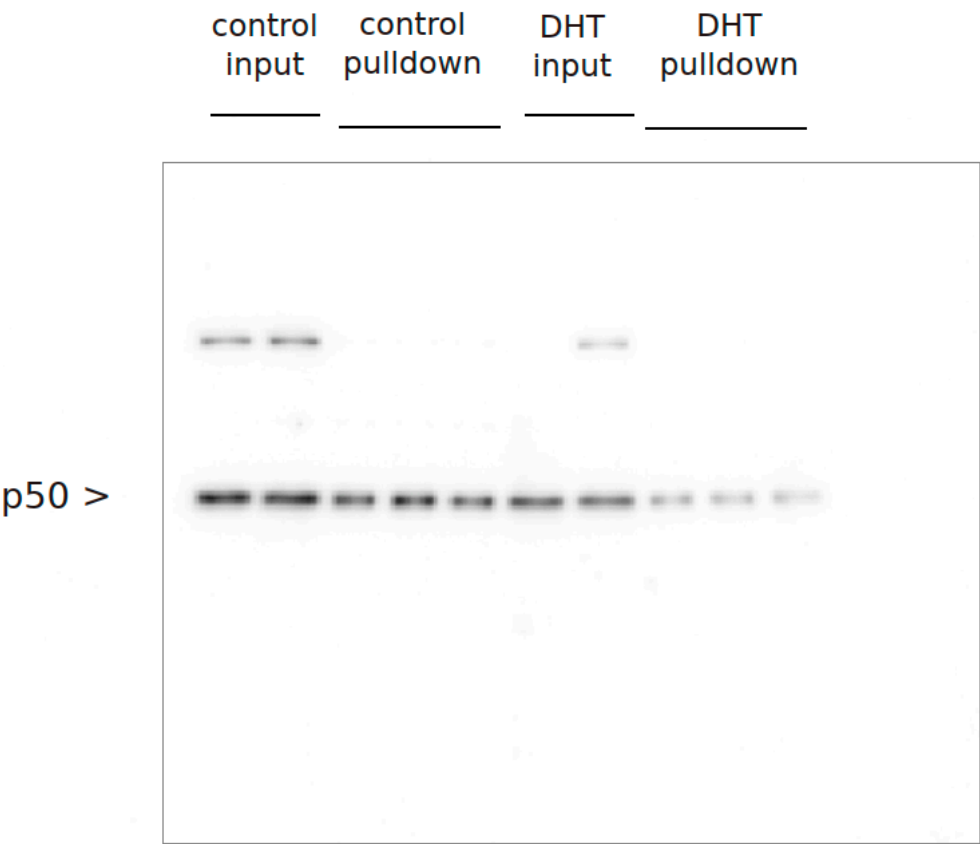

LNCaP:  $\beta$ -Tubulin. (new sample application).

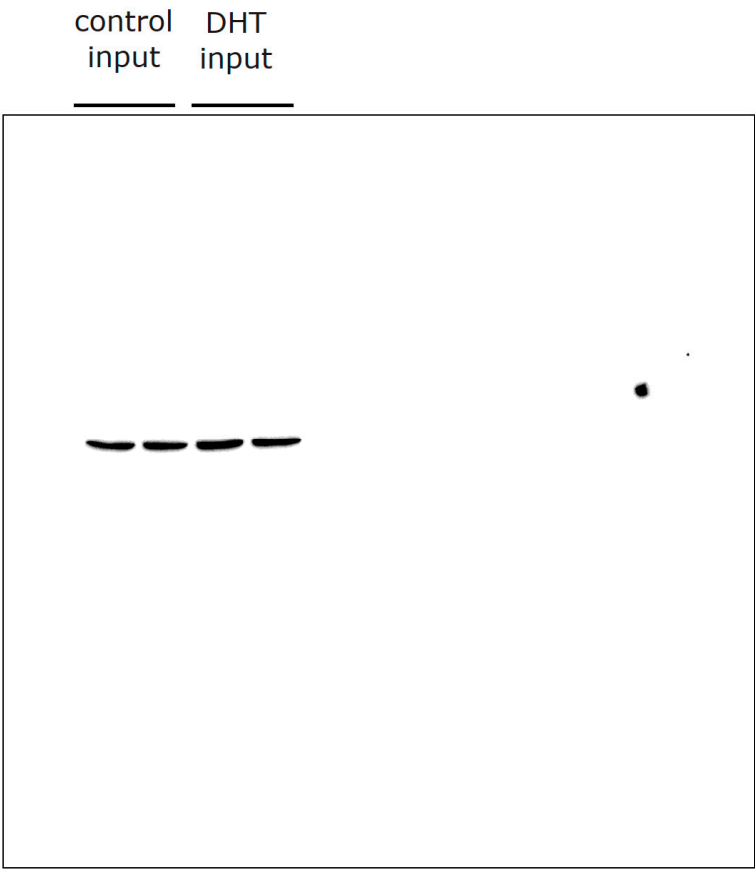

VCaP p65.

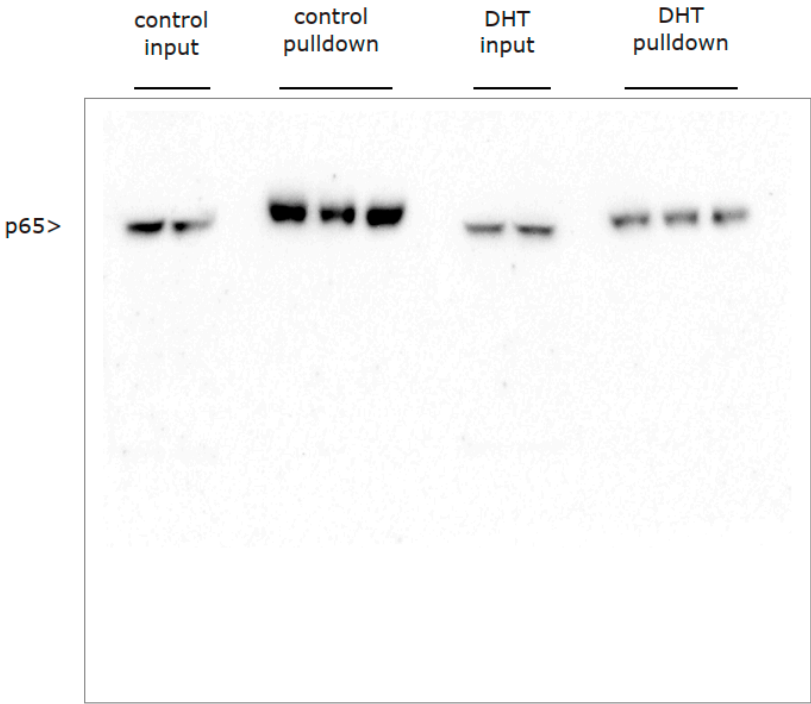

VCaP p50.

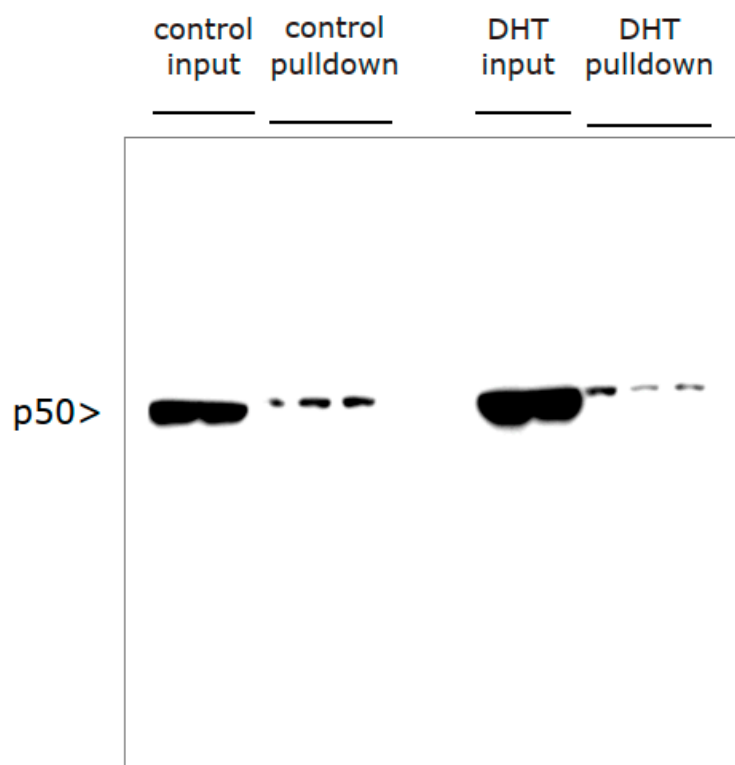

VCaP  $\beta$ -Tubulin.

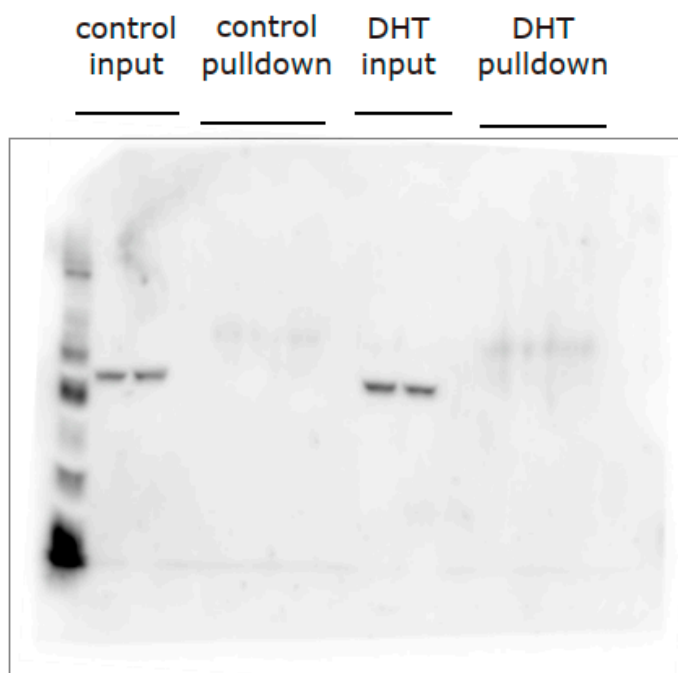

**Figure S5.** Full Western blots. For Figure 1 E, F, I, J.

**Table S1.** NF- $\kappa$ B responsive genes from GSE26410.

| PROBEID  | ENTREZID | ENSEMBL            | SYMBOL   | GENENAME                                                                            |
|----------|----------|--------------------|----------|-------------------------------------------------------------------------------------|
| 10449000 | 56047    | ENSMUSG00000063011 | Msln     | mesothelin                                                                          |
| 10581605 | 15439    | ENSMUSG00000031722 | Hp       | haptoglobin                                                                         |
| 10538732 | 14804    | ENSMUSG00000071424 | Grid2    | glutamate receptor, ionotropic, delta 2                                             |
| 10549041 | 108096   | ENSMUSG00000063975 | Slco1a5  | solute carrier organic anion transporter family, member 1a5                         |
| 10425354 | 17309    | ENSMUSG00000042428 | Mgat3    | mannoside acetylglucosaminyltransferase 3                                           |
| 10583519 | 15894    | ENSMUSG00000037405 | Icam1    | intercellular adhesion molecule 1                                                   |
| 10519497 | 117167   | ENSMUSG00000012428 | Steap4   | STEAP family member 4                                                               |
| 10538150 | 66058    | ENSMUSG00000023367 | Tmem176a | transmembrane protein 176A                                                          |
| 10538503 | 232016   | ENSMUSG00000037973 | Itprid1  | ITPR interacting domain containing 1                                                |
| 10539449 | 110935   | ENSMUSG00000006269 | Atp6v1b1 | ATPase, H <sup>+</sup> transporting, lysosomal V1 subunit B1                        |
| 10396849 | 19363    | ENSMUSG00000059060 | Rad51b   | RAD51 paralog B                                                                     |
| 10400304 | 112407   | ENSMUSG00000035105 | Egln3    | egl-9 family hypoxia-inducible factor 3                                             |
| 10401527 | 16997    | ENSMUSG00000002020 | Ltbp2    | latent transforming growth factor beta binding protein 2                            |
| 10534152 | 212996   | ENSMUSG00000034040 | Galnt17  | polypeptide N-acetylgalactosaminyltransferase 17                                    |
| 10400405 | 18035    | ENSMUSG00000021025 | Nfkbia   | nuclear factor of kappa light polypeptide gene enhancer in B cells inhibitor, alpha |
| 10490903 | 71934    | ENSMUSG00000027555 | Car13    | carbonic anhydrase 13                                                               |
| 10577560 | 16150    | ENSMUSG00000031537 | Ikbkb    | inhibitor of kappaB kinase beta                                                     |
| 10441902 | 64074    | ENSMUSG00000023886 | Smoc2    | SPARC related modular calcium binding 2                                             |
| 10490923 | 12349    | ENSMUSG00000027562 | Car2     | carbonic anhydrase 2                                                                |
| 10371607 | 71712    | ENSMUSG00000020057 | Dram1    | DNA-damage regulated autophagy modulator 1                                          |
| 10567335 | 56209    | ENSMUSG00000033917 | Gde1     | glycerophosphodiester phosphodiesterase 1                                           |
| 10469786 | 215257   | ENSMUSG00000044103 | Il36g    | interleukin 36G                                                                     |
| 10490989 | 12870    | ENSMUSG00000003617 | Cp       | ceruloplasmin                                                                       |
| 10502552 | 12722    | ENSMUSG00000056025 | Clca3a1  | chloride channel accessory 3A1                                                      |
| 10587799 | 18828    | ENSMUSG00000032372 | Plscr2   | phospholipid scramblase 2                                                           |
| 10582303 | 13057    | ENSMUSG00000006519 | Cyba     | cytochrome b-245, alpha polypeptide                                                 |
| 10429520 | 17068    | ENSMUSG00000034634 | Ly6d     | lymphocyte antigen 6 complex, locus D                                               |
| 10472289 | 21353    | ENSMUSG00000064289 | Tank     | TRAF family member-associated Nf-kappa B activator                                  |
| 10385083 | 216643   | ENSMUSG00000020159 | Gabrp    | gamma-aminobutyric acid (GABA) A receptor, pi                                       |
| 10531972 | 76074    | ENSMUSG00000034438 | Gbp8     | guanylate-binding protein 8                                                         |



|          |        |                    |          |                                                                                       |
|----------|--------|--------------------|----------|---------------------------------------------------------------------------------------|
| 10580807 | 16582  | ENSMUSG00000031788 | Kifc3    | kinesin family member C3                                                              |
| 10379153 | 11676  | ENSMUSG00000017390 | Aldoc    | aldolase C, fructose-bisphosphate                                                     |
| 10591754 | 235048 | ENSMUSG00000062794 | Zfp599   | zinc finger protein 599                                                               |
| 10445412 | 18037  | ENSMUSG00000023947 | Nfkbie   | nuclear factor of kappa light polypeptide gene enhancer in B cells inhibitor, epsilon |
| 10384233 | 319939 | ENSMUSG00000020422 | Tns3     | tensin 3                                                                              |
| 10544596 | 65963  | ENSMUSG00000029810 | Tmem176b | transmembrane protein 176B                                                            |
| 10567366 | 67133  | ENSMUSG00000030954 | Gp2      | glycoprotein 2 (zymogen granule membrane)                                             |
| 10439138 | 545156 | ENSMUSG00000061751 | Kalrn    | kalirin, RhoGEF kinase                                                                |
| 10588037 | 19659  | ENSMUSG00000046402 | Rbp1     | retinol binding protein 1, cellular                                                   |
| 10416689 | 380924 | ENSMUSG00000022026 | Olfm4    | olfactomedin 4                                                                        |
| 10439087 | 224116 | ENSMUSG00000035638 | Muc20    | mucin 20                                                                              |
| 10442625 | 16005  | ENSMUSG00000046070 | Igfals   | insulin-like growth factor binding protein, acid labile subunit                       |
| 10491477 | 20674  | ENSMUSG00000074637 | Sox2     | SRY (sex determining region Y)-box 2                                                  |
| 10493831 | 20201  | ENSMUSG00000056054 | S100a8   | S100 calcium binding protein A8 (calgranulin A)                                       |
| 10444752 | 16994  | ENSMUSG00000024399 | Ltb      | lymphotoxin B                                                                         |
| 10574220 | 20312  | ENSMUSG00000031778 | Cx3cl1   | chemokine (C-X3-C motif) ligand 1                                                     |
| 10436958 | 209195 | ENSMUSG00000022949 | Clic6    | chloride intracellular channel 6                                                      |
| 10499861 | 20202  | ENSMUSG00000056071 | S100a9   | S100 calcium binding protein A9 (calgranulin B)                                       |
| 10509838 | 18600  | ENSMUSG00000028927 | Padi2    | peptidyl arginine deiminase, type II                                                  |
| 10538187 | 93695  | ENSMUSG00000029816 | Gpnmb    | glycoprotein (transmembrane) nmb                                                      |
| 10563377 | 54200  | ENSMUSG00000003271 | Sult2b1  | sulfotransferase family, cytosolic, 2B, member 1                                      |
| 10421863 | 18530  | ENSMUSG00000036422 | Pcdh8    | protocadherin 8                                                                       |
| 10357155 | 16324  | ENSMUSG00000037035 | Inhbb    | inhibin beta-B                                                                        |
| 10417561 | 268709 | ENSMUSG00000021750 | Fam107a  | family with sequence similarity 107, member A                                         |
| 10457628 | 71367  | ENSMUSG00000047161 | Chst9    | carbohydrate (N-acetylgalactosamine 4-0) sulfotransferase 9                           |
| 10469066 | 74186  | ENSMUSG00000026676 | Ccdc3    | coiled-coil domain containing 3                                                       |
| 10547664 | 56619  | ENSMUSG00000030142 | Clec4e   | C-type lectin domain family 4, member e                                               |
| 10396952 | 69480  | ENSMUSG00000042734 | Ttc9     | tetratricopeptide repeat domain 9                                                     |
| 10355967 | 252903 | ENSMUSG00000054702 | Ap1s3    | adaptor-related protein complex AP-1, sigma 3                                         |
| 10425053 | 17972  | ENSMUSG00000071715 | Ncf4     | neutrophil cytosolic factor 4                                                         |
| 10348858 | 51800  | ENSMUSG00000026278 | Bok      | BCL2-related ovarian killer                                                           |
| 10541114 | 70727  | ENSMUSG00000030134 | Rasgef1a | RasGEF domain family, member 1A                                                       |
| 10437073 | 170765 | ENSMUSG00000022941 | Ripply3  | rippy transcriptional repressor 3                                                     |

|          |        |                    |          |                                                              |
|----------|--------|--------------------|----------|--------------------------------------------------------------|
| 10518300 | 21938  | ENSMUSG00000028599 | Tnfrsf1b | tumor necrosis factor receptor superfamily, member 1b        |
| 10501608 | 22329  | ENSMUSG00000027962 | Vcam1    | vascular cell adhesion molecule 1                            |
| 10458382 | 12475  | ENSMUSG00000051439 | Cd14     | CD14 antigen                                                 |
| 10549276 | 79362  | ENSMUSG00000030256 | Bhlhe41  | basic helix-loop-helix family, member e41                    |
| 10523145 | 20309  | ENSMUSG00000029375 | Cxcl15   | chemokine (C-X-C motif) ligand 15                            |
| 10445746 | 58217  | ENSMUSG00000042265 | Trem1    | triggering receptor expressed on myeloid cells 1             |
| 10493984 | 99681  | ENSMUSG00000052415 | Tchh     | trichohyalin                                                 |
| 10541614 | 17474  | ENSMUSG00000030144 | Clec4d   | C-type lectin domain family 4, member d                      |
| 10559185 | 55925  | ENSMUSG00000031098 | Syt8     | synaptotagmin VIII                                           |
| 10395103 | 69675  | ENSMUSG00000020674 | Pxdn     | peroxidase                                                   |
| 10411373 | 15212  | ENSMUSG00000021665 | Hexb     | hexosaminidase B                                             |
| 10544273 | 23845  | ENSMUSG00000029915 | Clec5a   | C-type lectin domain family 5, member a                      |
| 10452316 | 12266  | ENSMUSG00000024164 | C3       | complement component 3                                       |
| 10523120 | 20311  | ENSMUSG00000029371 | Cxcl5    | chemokine (C-X-C motif) ligand 5                             |
| 10458283 | 381148 | ENSMUSG00000073600 | Prob1    | proline rich basic protein 1                                 |
| 10583071 | 17392  | ENSMUSG00000043613 | Mmp3     | matrix metalloproteinase 3                                   |
| 10511429 | 12319  | ENSMUSG00000041261 | Car8     | carbonic anhydrase 8                                         |
| 10542164 | 232413 | ENSMUSG00000053063 | Clec12a  | C-type lectin domain family 12, member a                     |
| 10484227 | 228071 | ENSMUSG00000042272 | Sestd1   | SEC14 and spectrin domains 1                                 |
| 10575598 | 170737 | ENSMUSG00000033545 | Znrf1    | zinc and ring finger 1                                       |
| 10367822 | 67844  | ENSMUSG00000019832 | Rab32    | RAB32, member RAS oncogene family                            |
| 10456492 | 52662  | ENSMUSG00000024544 | Ldlrad4  | low density lipoprotein receptor class A domain containing 4 |
| 10533720 | 80885  | ENSMUSG00000045502 | Hcar2    | hydroxycarboxylic acid receptor 2                            |
| 10419096 | 20390  | ENSMUSG00000021795 | Sftpd    | surfactant associated protein D                              |
| 10512022 | 214944 | ENSMUSG00000073910 | Mob3b    | MOB kinase activator 3B                                      |
| 10497590 | 14013  | ENSMUSG00000027684 | Mecom    | MDS1 and EVI1 complex locus                                  |
| 10450069 | 630499 | ENSMUSG00000067203 | H2-K2    | histocompatibility 2, K region locus 2                       |
| 10491091 | 22035  | ENSMUSG00000039304 | Tnfsf10  | tumor necrosis factor (ligand) superfamily, member 10        |
| 10559276 | 16535  | ENSMUSG00000009545 | Kcnq1    | potassium voltage-gated channel, subfamily Q, member 1       |
| 10511779 | 242341 | ENSMUSG00000028238 | Atp6v0d2 | ATPase, H <sup>+</sup> transporting, lysosomal V0 subunit D2 |
| 10521111 | 14184  | ENSMUSG00000054252 | Fgfr3    | fibroblast growth factor receptor 3                          |
| 10517791 | 18602  | ENSMUSG00000025330 | Padi4    | peptidyl arginine deiminase, type IV                         |
| 10484201 | 545428 | ENSMUSG00000044033 | Ccdc141  | coiled-coil domain containing 141                            |

|          |        |                                           |          |                                                                                |
|----------|--------|-------------------------------------------|----------|--------------------------------------------------------------------------------|
| 10388254 | 11484  | ENSMUSG00000020774                        | Aspa     | aspartoacylase                                                                 |
| 10551293 | 13107  | ENSMUSG00000052974                        | Cyp2f2   | cytochrome P450, family 2, subfamily f, polypeptide 2                          |
| 10534202 | 17969  | ENSMUSG00000015950                        | Ncf1     | neutrophil cytosolic factor 1                                                  |
| 10357115 | 319901 | ENSMUSG00000038702                        | Dsel     | dermatan sulfate epimerase-like                                                |
| 10592044 | 235135 | ENSMUSG00000041737                        | Tmem45b  | transmembrane protein 45b                                                      |
| 10466127 | 107350 | ENSMUSG00000075010                        | AW112010 | expressed sequence AW112010                                                    |
| 10446739 | 78785  | ENSMUSG00000024059                        | Clip4    | CAP-GLY domain containing linker protein family, member 4                      |
| 10560575 | 19698  | ENSMUSG00000002983                        | Relb     | avian reticuloendotheliosis viral (v-rel) oncogene related B                   |
| 10367673 | 213783 | ENSMUSG00000040624                        | Plekhg1  | pleckstrin homology domain containing, family G (with RhoGef domain) member 1  |
| 10499854 | 20193  | ENSMUSG00000044080                        | S100a1   | S100 calcium binding protein A1                                                |
| 10587315 | 14860  | ENSMUSG00000032348                        | Gsta4    | glutathione S-transferase, alpha 4                                             |
| 10573115 | 330812 | ENSMUSG00000047747                        | Rnf150   | ring finger protein 150                                                        |
| 10464030 | 11551  | ENSMUSG00000033717                        | Adra2a   | adrenergic receptor, alpha 2a                                                  |
| 10427052 | 110310 | ENSMUSG00000023039                        | Krt7     | keratin 7                                                                      |
| 10508074 | 12986  | ENSMUSG00000028859                        | Csf3r    | colony stimulating factor 3 receptor (granulocyte)                             |
| 10408850 | 18003  | ENSMUSG00000021365                        | Nedd9    | neural precursor cell expressed, developmentally down-regulated gene 9         |
| 10437151 | 16516  | ENSMUSG00000062609                        | Kcnj15   | potassium inwardly-rectifying channel, subfamily J, member 15                  |
| 10492136 | 13175  | ENSMUSG00000027797                        | Dclk1    | doublecortin-like kinase 1                                                     |
| 10357003 | 320311 | ENSMUSG00000047496                        | Rnf152   | ring finger protein 152                                                        |
| 10368144 | 21929  | ENSMUSG00000019850                        | Tnfaip3  | tumor necrosis factor, alpha-induced protein 3                                 |
| 10597743 | 13051  | ENSMUSG00000052336                        | Cx3cr1   | chemokine (C-X3-C motif) receptor 1                                            |
| 10551883 | 22177  | ENSMUSG00000030579                        | Tyrbp    | TYRO protein tyrosine kinase binding protein                                   |
| 10544638 | 101214 | ENSMUSG00000029817                        | Tra2a    | transformer 2 alpha                                                            |
| 10476021 | 19261  | ENSMUSG00000037902                        | Sirpa    | signal-regulatory protein alpha                                                |
| 10363082 | 14728  | ENSMUSG00000062593,<br>ENSMUSG00000112148 | Lilrb4a  | leukocyte immunoglobulin-like receptor, subfamily B, member 4A                 |
| 10562234 | 15451  | ENSMUSG00000001249                        | Hpn      | hepsin                                                                         |
| 10417713 | 218772 | ENSMUSG00000017491                        | Rarb     | retinoic acid receptor, beta                                                   |
| 10361186 | 214791 | ENSMUSG00000016262                        | Sertad4  | SERTA domain containing 4                                                      |
| 10530841 | 29817  | ENSMUSG00000036256                        | Igfbp7   | insulin-like growth factor binding protein 7                                   |
| 10463599 | 18034  | ENSMUSG00000025225                        | Nfkb2    | nuclear factor of kappa light polypeptide gene enhancer in B cells 2, p49/p100 |
| 10518147 | 14726  | ENSMUSG00000028583                        | Pdpr     | podoplanin                                                                     |
| 10347291 | 12765  | ENSMUSG00000026180                        | Cxcr2    | chemokine (C-X-C motif) receptor 2                                             |

|          |        |                    |         |                                                                                          |
|----------|--------|--------------------|---------|------------------------------------------------------------------------------------------|
| 10444268 | 21355  | ENSMUSG00000024339 | Tap2    | transporter 2, ATP-binding cassette, sub-family B (MDR/TAP)                              |
| 10596148 | 22041  | ENSMUSG00000032554 | Trf     | transferrin                                                                              |
| 10450501 | 21926  | ENSMUSG00000024401 | Tnf     | tumor necrosis factor                                                                    |
| 10407803 | 83924  | ENSMUSG00000021306 | Gpr137b | G protein-coupled receptor 137B                                                          |
| 10502622 | 23844  | ENSMUSG00000028255 | Clca1   | chloride channel accessory 1                                                             |
| 10429524 | 78725  | ENSMUSG00000101026 | Ly6g6g  | lymphocyte antigen 6 complex, locus G6G                                                  |
| 10450484 | 11629  | ENSMUSG00000024397 | Aif1    | allograft inflammatory factor 1                                                          |
| 10423024 | 75568  | ENSMUSG00000039676 | Capsl   | calcyphosine-like                                                                        |
| 10563858 | 14407  | ENSMUSG00000055026 | Gabrg3  | gamma-aminobutyric acid (GABA) A receptor, subunit gamma 3                               |
| 10435565 | 15163  | ENSMUSG00000022831 | Hcls1   | hematopoietic cell specific Lyn substrate 1                                              |
| 10607467 | 20229  | ENSMUSG00000025283 | Sat1    | spermidine/spermine N1-acetyl transferase 1                                              |
| 10355214 | 15926  | ENSMUSG00000025950 | Idh1    | isocitrate dehydrogenase 1 (NADP+), soluble                                              |
| 10450145 | 16912  | ENSMUSG00000096727 | Psmb9   | proteasome (prosome, macropain) subunit, beta type 9 (large multifunctional peptidase 2) |
| 10401238 | 12192  | ENSMUSG00000021127 | Zfp361l | zinc finger protein 36, C3H type-like 1                                                  |
| 10351679 | 12523  | ENSMUSG00000038147 | Cd84    | CD84 antigen                                                                             |
| 10508772 | 14191  | ENSMUSG00000028874 | Fgr     | FGR proto-oncogene, Src family tyrosine kinase                                           |
| 10389231 | 20302  | ENSMUSG00000000982 | Ccl3    | chemokine (C-C motif) ligand 3                                                           |
| 10547621 | 11810  | ENSMUSG00000040613 | Apobec1 | apolipoprotein B mRNA editing enzyme, catalytic polypeptide 1                            |
| 10464167 | 11554  | ENSMUSG00000035283 | Adrb1   | adrenergic receptor, beta 1                                                              |
| 10487597 | 16176  | ENSMUSG00000027398 | Il1b    | interleukin 1 beta                                                                       |
| 10435457 | 80285  | ENSMUSG00000022906 | Parp9   | poly (ADP-ribose) polymerase family, member 9                                            |
| 10444258 | 16913  | ENSMUSG00000024338 | Psmb8   | proteasome (prosome, macropain) subunit, beta type 8 (large multifunctional peptidase 7) |
| 10540472 | 20893  | ENSMUSG00000030103 | Bhlhe40 | basic helix-loop-helix family, member e40                                                |
| 10541605 | 56620  | ENSMUSG00000023349 | Clec4n  | C-type lectin domain family 4, member n                                                  |
| 10458828 | 12583  | ENSMUSG00000033022 | Cdo1    | cysteine dioxygenase 1, cytosolic                                                        |
| 10580635 | 104158 | ENSMUSG00000056973 | Ces1d   | carboxylesterase 1D                                                                      |
| 10436100 | 245195 | ENSMUSG00000022651 | Retnlg  | resistin like gamma                                                                      |
| 10494271 | 13040  | ENSMUSG00000038642 | Ctss    | cathepsin S                                                                              |
| 10602198 | 18481  | ENSMUSG00000031284 | Pak3    | p21 (RAC1) activated kinase 3                                                            |
| 10527638 | 11690  | ENSMUSG00000060063 | Alox5ap | arachidonate 5-lipoxygenase activating protein                                           |
| 10349782 | 74137  | ENSMUSG00000009772 | Nuak2   | NUAK family, SNF1-like kinase, 2                                                         |

|          |        |                    |         |                                                                 |
|----------|--------|--------------------|---------|-----------------------------------------------------------------|
| 10441003 | 12394  | ENSMUSG00000022952 | Runx1   | runt related transcription factor 1                             |
| 10392815 | 140497 | ENSMUSG00000044811 | Cd300c2 | CD300C molecule 2                                               |
| 10371111 | 27375  | ENSMUSG00000034917 | Tjp3    | tight junction protein 3                                        |
| 10473024 | 228061 | ENSMUSG00000042410 | Agps    | alkylglycerone phosphate synthase                               |
| 10419170 | 70561  | ENSMUSG00000021830 | Txndc16 | thioredoxin domain containing 16                                |
| 10462442 | 77125  | ENSMUSG00000024810 | Il33    | interleukin 33                                                  |
| 10379530 | 20293  | ENSMUSG00000035352 | Ccl12   | chemokine (C-C motif) ligand 12                                 |
| 10505911 | 242523 | ENSMUSG00000043753 | Dmrta1  | doublesex and mab-3 related transcription factor like family A1 |
| 10436608 | 13052  | ENSMUSG00000022865 | Cxadr   | coxsackie virus and adenovirus receptor                         |
| 10444814 | 15015  | ENSMUSG00000035929 | H2-Q4   | histocompatibility 2, Q region locus 4                          |
| 10569877 | 69189  | ENSMUSG00000013974 | Mcemp1  | mast cell expressed membrane protein 1                          |
| 10577641 | 69068  | ENSMUSG00000056313 | Tcim    | transcriptional and immune response regulator                   |
| 10498992 | 24088  | ENSMUSG00000027995 | Tlr2    | toll-like receptor 2                                            |
| 10449741 | 17691  | ENSMUSG00000024042 | Sik1    | salt inducible kinase 1                                         |
| 10446253 | 22324  | ENSMUSG00000034116 | Vav1    | vav 1 oncogene                                                  |
| 10386033 | 245827 | ENSMUSG00000055333 | Fat2    | FAT atypical cadherin 2                                         |
| 10387890 | 66102  | ENSMUSG00000018920 | Cxcl16  | chemokine (C-X-C motif) ligand 16                               |
| 10384458 | 56193  | ENSMUSG00000020120 | Plek    | pleckstrin                                                      |
| 10356475 | 320982 | ENSMUSG00000049866 | Arl4c   | ADP-ribosylation factor-like 4C                                 |
| 10376060 | 16362  | ENSMUSG00000018899 | Irf1    | interferon regulatory factor 1                                  |
| 10430660 | 18591  | ENSMUSG00000000489 | Pdgfb   | platelet derived growth factor, B polypeptide                   |
| 10586491 | 13143  | ENSMUSG00000032380 | Dapk2   | death-associated protein kinase 2                               |
| 10497372 | 381484 | ENSMUSG00000078780 | Gm5150  | predicted gene 5150                                             |
| 10421697 | 210808 | ENSMUSG00000044350 | Lacc1   | laccase domain containing 1                                     |
| 10599174 | 16164  | ENSMUSG00000017057 | Il13ra1 | interleukin 13 receptor, alpha 1                                |
| 10385583 | 17001  | ENSMUSG00000020377 | Ltc4s   | leukotriene C4 synthase                                         |
| 10456756 | 207259 | ENSMUSG00000044646 | Zbtb7c  | zinc finger and BTB domain containing 7C                        |
| 10583008 | 12364  | ENSMUSG00000025887 | Casp12  | caspase 12                                                      |
| 10557326 | 16190  | ENSMUSG00000030748 | Il4ra   | interleukin 4 receptor, alpha                                   |
| 10397645 | 14744  | ENSMUSG00000021886 | Gpr65   | G-protein coupled receptor 65                                   |
| 10478698 | 14049  | ENSMUSG00000017897 | Eya2    | EYA transcriptional coactivator and phosphatase 2               |
| 10389222 | 20305  | ENSMUSG00000018927 | Ccl6    | chemokine (C-C motif) ligand 6                                  |
| 10556616 | 74424  | ENSMUSG00000030650 | Tmc5    | transmembrane channel-like gene family 5                        |

|          |        |                     |          |                                                                |
|----------|--------|---------------------|----------|----------------------------------------------------------------|
| 10466659 | 14544  | ENSMUSG00000058624  | Gda      | guanine deaminase                                              |
| 10523156 | 20310  | ENSMUSG00000058427  | Cxcl2    | chemokine (C-X-C motif) ligand 2                               |
| 10542470 | 56615  | ENSMUSG00000008540  | Mgst1    | microsomal glutathione S-transferase 1                         |
| 10409314 | 17702  | ENSMUSG000000021469 | Msx2     | msh homeobox 2                                                 |
| 10360070 | 14127  | ENSMUSG00000058715  | Fcer1g   | Fc receptor, IgE, high affinity I, gamma polypeptide           |
| 10589654 | 235633 | ENSMUSG00000044037  | Als2cl   | ALS2 C-terminal like                                           |
| 10477250 | 15162  | ENSMUSG00000003283  | Hck      | hemopoietic cell kinase                                        |
| 10517517 | 12259  | ENSMUSG00000036887  | C1qa     | complement component 1, q subcomponent, alpha polypeptide      |
| 10478525 | 67701  | ENSMUSG00000017723  | Wfdc2    | WAP four-disulfide core domain 2                               |
| 10536505 | 17295  | ENSMUSG00000009376  | Met      | met proto-oncogene                                             |
| 10521892 | 20531  | ENSMUSG000000029188 | Slc34a2  | solute carrier family 34 (sodium phosphate), member 2          |
| 10387536 | 12514  | ENSMUSG00000018774  | Cd68     | CD68 antigen                                                   |
| 10582985 | 12362  | ENSMUSG00000025888  | Casp1    | caspase 1                                                      |
| 10550509 | 21946  | ENSMUSG00000030413  | Pglyrp1  | peptidoglycan recognition protein 1                            |
| 10492586 | 71619  | ENSMUSG000000098207 | Arl14    | ADP-ribosylation factor-like 14                                |
| 10598004 | 12768  | ENSMUSG000000025804 | Ccr1     | chemokine (C-C motif) receptor 1                               |
| 10517513 | 12262  | ENSMUSG00000036896  | C1qc     | complement component 1, q subcomponent, C chain                |
| 10392808 | 217305 | ENSMUSG00000034641  | Cd300ld  | CD300 molecule like family member d                            |
| 10575095 | 15118  | ENSMUSG000000031910 | Has3     | hyaluronan synthase 3                                          |
| 10572679 | 234407 | ENSMUSG00000034807  | Colgalt1 | collagen beta(1-O)galactosyltransferase 1                      |
| 10461614 | 73656  | ENSMUSG00000079419  | Ms4a6c   | membrane-spanning 4-domains, subfamily A, member 6C            |
| 10461721 | 17476  | ENSMUSG00000046805  | Mpeg1    | macrophage expressed gene 1                                    |
| 10583203 | 18689  | ENSMUSG000000031802 | Phxr4    | per-hexamer repeat gene 4                                      |
| 10444821 | 15016  | ENSMUSG00000055413  | H2-Q5    | histocompatibility 2, Q region locus 5                         |
| 10483000 | 16420  | ENSMUSG00000026971  | Itgb6    | integrin beta 6                                                |
| 10418506 | 192187 | ENSMUSG00000042286  | Stab1    | stabilin 1                                                     |
| 10582997 | 12363  | ENSMUSG00000033538  | Casp4    | caspase 4, apoptosis-related cysteine peptidase                |
| 10530615 | 433904 | ENSMUSG00000029153  | Ociad2   | OCIA domain containing 2                                       |
| 10363070 | 14727  | ENSMUSG00000112023  | Lilrb4b  | leukocyte immunoglobulin-like receptor, subfamily B, member 4B |
| 10501164 | 12977  | ENSMUSG00000014599  | Csf1     | colony stimulating factor 1 (macrophage)                       |
| 10548892 | 11857  | ENSMUSG00000030220  | Arhgdib  | Rho, GDP dissociation inhibitor (GDI) beta                     |
| 10490159 | 65112  | ENSMUSG00000038400  | Pmepa1   | prostate transmembrane protein, androgen induced 1             |
| 10592084 | 20443  | ENSMUSG00000032038  | St3gal4  | ST3 beta-galactoside alpha-2,3-sialyltransferase 4             |

|          |        |                     |               |                                                                                     |
|----------|--------|---------------------|---------------|-------------------------------------------------------------------------------------|
| 10392845 | 246746 | ENSMUSG00000047798  | Cd300lf       | CD300 molecule like family member F                                                 |
| 10478633 | 17395  | ENSMUSG00000017737  | Mmp9          | matrix metalloproteinase 9                                                          |
| 10356764 | 71874  | ENSMUSG00000034159  | Mab21l4       | mab-21-like 4                                                                       |
| 10581378 | 19171  | ENSMUSG000000031897 | Psm1b10       | proteasome (prosome, macropain) subunit, beta type 10                               |
| 10602081 | 78789  | ENSMUSG000000031430 | Vsig1         | V-set and immunoglobulin domain containing 1                                        |
| 10417544 | 93732  | ENSMUSG000000021751 | Acox2         | acyl-Coenzyme A oxidase 2, branched chain                                           |
| 10462881 | 107221 | ENSMUSG000000054200 | Ffar4         | free fatty acid receptor 4                                                          |
| 10358434 | 18783  | ENSMUSG000000056220 | Pla2g4a       | phospholipase A2, group IVA (cytosolic, calcium-dependent)                          |
| 10590631 | 12772  | ENSMUSG000000049103 | Ccr2          | chemokine (C-C motif) receptor 2                                                    |
| 10598013 | 12774  | ENSMUSG000000079227 | Ccr5          | chemokine (C-C motif) receptor 5                                                    |
| 10501048 | 69206  | ENSMUSG000000091575 | 2010016I18Rik | RIKEN cDNA 2010016I18 gene                                                          |
| 10347335 | 18173  | ENSMUSG000000026177 | Slc11a1       | solute carrier family 11 (proton-coupled divalent metal ion transporters), member 1 |
| 10500335 | 14129  | ENSMUSG000000015947 | Fcgr1         | Fc receptor, IgG, high affinity I                                                   |
| 10458314 | 72512  | ENSMUSG000000024349 | Sting1        | stimulator of interferon response cGAMP interactor 1                                |
| 10351224 | 14067  | ENSMUSG000000026579 | F5            | coagulation factor V                                                                |
| 10383502 | 80879  | ENSMUSG000000025161 | Slc16a3       | solute carrier family 16 (monocarboxylic acid transporters), member 3               |
| 10450325 | 14962  | ENSMUSG000000090231 | Cfb           | complement factor B                                                                 |
| 10500656 | 630146 | ENSMUSG000000086564 | Cd101         | CD101 antigen                                                                       |
| 10467153 | 240638 | ENSMUSG000000009378 | Slc16a12      | solute carrier family 16 (monocarboxylic acid transporters), member 12              |
| 10381096 | 16010  | ENSMUSG000000017493 | Igfbp4        | insulin-like growth factor binding protein 4                                        |
| 10601385 | 279572 | ENSMUSG000000033777 | Tlr13         | toll-like receptor 13                                                               |
| 10501063 | 12508  | ENSMUSG000000040747 | Cd53          | CD53 antigen                                                                        |
| 10443980 | 17916  | ENSMUSG000000024300 | Myo1f         | myosin IF                                                                           |
| 10434559 | 13845  | ENSMUSG000000005958 | Ephb3         | Eph receptor B3                                                                     |
| 10412267 | 16398  | ENSMUSG000000015533 | Itga2         | integrin alpha 2                                                                    |
| 10519140 | 26561  | ENSMUSG000000029061 | Mmp23         | matrix metalloproteinase 23                                                         |
| 10559486 | 52855  | ENSMUSG000000055541 | Lair1         | leukocyte-associated Ig-like receptor 1                                             |
| 10349295 | 81879  | ENSMUSG000000026380 | Tfcp2l1       | transcription factor CP2-like 1                                                     |
| 10420891 | 219151 | ENSMUSG000000034463 | Scara3        | scavenger receptor class A, member 3                                                |
| 10514466 | 16476  | ENSMUSG000000052684 | Jun           | jun proto-oncogene                                                                  |
| 10412562 | 286940 | ENSMUSG000000025278 | Flnb          | filamin, beta                                                                       |
| 10443730 | 11307  | ENSMUSG000000024030 | Abcg1         | ATP binding cassette subfamily G member 1                                           |
| 10499189 | 80891  | ENSMUSG000000015852 | Fcrls         | Fc receptor-like S, scavenger receptor                                              |

|          |        |                     |          |                                                                                                       |
|----------|--------|---------------------|----------|-------------------------------------------------------------------------------------------------------|
| 10579636 | 72054  | ENSMUSG00000003484  | Cyp4f18  | cytochrome P450, family 4, subfamily f, polypeptide 18                                                |
| 10456357 | 58801  | ENSMUSG000000024521 | Pmaip1   | phorbol-12-myristate-13-acetate-induced protein 1                                                     |
| 10466521 | 14537  | ENSMUSG000000038843 | Gcnt1    | glucosaminyl (N-acetyl) transferase 1, core 2                                                         |
| 10456005 | 16149  | ENSMUSG000000024610 | Cd74     | CD74 antigen (invariant polypeptide of major histocompatibility complex, class II antigen-associated) |
| 10442565 | 71893  | ENSMUSG000000019320 | Noxo1    | NADPH oxidase organizer 1                                                                             |
| 10458303 | 68545  | ENSMUSG000000073599 | Ecsr     | endothelial cell surface expressed chemotaxis and apoptosis regulator                                 |
| 10538791 | 414084 | ENSMUSG000000044162 | Tnip3    | TNFAIP3 interacting protein 3                                                                         |
| 10369615 | 19073  | ENSMUSG000000020077 | Srgn     | serglycin                                                                                             |
| 10450154 | 14960  | ENSMUSG000000036594 | H2-Aa    | histocompatibility 2, class II antigen A, alpha                                                       |
| 10583669 | 382062 | ENSMUSG000000057191 | AB124611 | cDNA sequence AB124611                                                                                |
| 10425808 | 12257  | ENSMUSG000000041736 | Tspo     | translocator protein                                                                                  |
| 10604961 | 14396  | ENSMUSG000000031343 | Gabra3   | gamma-aminobutyric acid (GABA) A receptor, subunit alpha 3                                            |
| 10357472 | 12767  | ENSMUSG000000045382 | Cxcr4    | chemokine (C-X-C motif) receptor 4                                                                    |
| 10446282 | 13733  | ENSMUSG000000004730 | Adgre1   | adhesion G protein-coupled receptor E1                                                                |
| 10360806 | 12334  | ENSMUSG000000026509 | Capn2    | calpain 2                                                                                             |
| 10475653 | 26458  | ENSMUSG000000027359 | Slc27a2  | solute carrier family 27 (fatty acid transporter), member 2                                           |
| 10568024 | 12721  | ENSMUSG000000030707 | Coro1a   | coronin, actin binding protein 1A                                                                     |
| 10445293 | 27226  | ENSMUSG000000023913 | Pla2g7   | phospholipase A2, group VII (platelet-activating factor acetylhydrolase, plasma)                      |
| 10405566 | 328258 | ENSMUSG000000021509 | Slc25a48 | solute carrier family 25, member 48                                                                   |
| 10562192 | 18301  | ENSMUSG000000009687 | Fxyd5    | FXD domain-containing ion transport regulator 5                                                       |
| 10363445 | 74048  | ENSMUSG000000020101 | Vsir     | V-set immunoregulatory receptor                                                                       |
| 10548375 | 56644  | ENSMUSG000000079293 | Clec7a   | C-type lectin domain family 7, member a                                                               |
| 10415052 | 17387  | ENSMUSG000000000957 | Mmp14    | matrix metalloproteinase 14 (membrane-inserted)                                                       |
| 10445112 | 24108  | ENSMUSG000000035186 | Ubd      | ubiquitin D                                                                                           |
| 10562709 | 12489  | ENSMUSG000000004609 | Cd33     | CD33 antigen                                                                                          |
| 10487321 | 66552  | ENSMUSG000000027366 | Sppl2a   | signal peptide peptidase like 2A                                                                      |
| 10565775 | 67800  | ENSMUSG000000030747 | Dgat2    | diacylglycerol O-acyltransferase 2                                                                    |
| 10404606 | 17084  | ENSMUSG000000021423 | Ly86     | lymphocyte antigen 86                                                                                 |
| 10391066 | 16667  | ENSMUSG000000035557 | Krt17    | keratin 17                                                                                            |
| 10512470 | 12517  | ENSMUSG000000028459 | Cd72     | CD72 antigen                                                                                          |
| 10548817 | 66857  | ENSMUSG000000030214 | Plbd1    | phospholipase B domain containing 1                                                                   |
| 10465861 | 16319  | ENSMUSG000000024660 | Incenp   | inner centromere protein                                                                              |



|          |        |                     |         |                                                                                          |
|----------|--------|---------------------|---------|------------------------------------------------------------------------------------------|
| 10541885 | 20276  | ENSMUSG00000030340  | Scnn1a  | sodium channel, nonvoltage-gated 1 alpha                                                 |
| 10592050 | 12023  | ENSMUSG00000032033  | Barx2   | BarH-like homeobox 2                                                                     |
| 10364262 | 16414  | ENSMUSG00000000290  | Itgb2   | integrin beta 2                                                                          |
| 10542050 | 381812 | ENSMUSG000000061414 | Cracr2a | calcium release activated channel regulator 2A                                           |
| 10471844 | 59126  | ENSMUSG000000026749 | Nek6    | NIMA (never in mitosis gene a)-related expressed kinase 6                                |
| 10404250 | 195208 | ENSMUSG000000035910 | Dcdc2a  | doublecortin domain containing 2a                                                        |
| 10427336 | 105855 | ENSMUSG000000022488 | Nckap1l | NCK associated protein 1 like                                                            |
| 10461558 | 65221  | ENSMUSG000000024737 | Slc15a3 | solute carrier family 15, member 3                                                       |
| 10493267 | 16800  | ENSMUSG000000028059 | Arhgef2 | rho/rac guanine nucleotide exchange factor (GEF) 2                                       |
| 10597518 | 21813  | ENSMUSG000000032440 | Tgfb2   | transforming growth factor, beta receptor II                                             |
| 10358027 | 13710  | ENSMUSG000000003051 | Elf3    | E74-like factor 3                                                                        |
| 10424686 | 223631 | ENSMUSG000000047728 | Ly6g2   | lymphocyte antigen 6 complex, locus G2                                                   |
| 10566709 | 244202 | ENSMUSG000000049709 | Nlrp10  | NLR family, pyrin domain containing 10                                                   |
| 10413047 | 18792  | ENSMUSG000000021822 | Plau    | plasminogen activator, urokinase                                                         |
| 10439268 | 209200 | ENSMUSG000000049502 | Dtx3l   | deltex 3-like, E3 ubiquitin ligase                                                       |
| 10349968 | 12654  | ENSMUSG000000064246 | Chil1   | chitinase-like 1                                                                         |
| 10560685 | 12051  | ENSMUSG000000053175 | Bcl3    | B cell leukemia/lymphoma 3                                                               |
| 10464529 | 27060  | ENSMUSG000000001750 | Tcirg1  | T cell, immune regulator 1, ATPase, H <sup>+</sup> transporting, lysosomal V0 protein A3 |
| 10560624 | 11816  | ENSMUSG000000002985 | ApoE    | apolipoprotein E                                                                         |
| 10473809 | 20375  | ENSMUSG000000002111 | Spi1    | spleen focus forming virus (SFFV) proviral integration oncogene                          |
| 10557862 | 16409  | ENSMUSG000000030786 | Itgam   | integrin alpha M                                                                         |
| 10414360 | 16854  | ENSMUSG000000050335 | Lgals3  | lectin, galactose binding, soluble 3                                                     |
| 10382912 | 53860  | ENSMUSG000000059248 | Septin9 | septin 9                                                                                 |
| 10557895 | 16411  | ENSMUSG000000030789 | Itgax   | integrin alpha X                                                                         |
| 10412773 | 218756 | ENSMUSG000000021733 | Slc4a7  | solute carrier family 4, sodium bicarbonate cotransporter, member 7                      |
| 10461622 | 69774  | ENSMUSG000000024677 | Ms4a6b  | membrane-spanning 4-domains, subfamily A, member 6B                                      |
| 10358224 | 19264  | ENSMUSG000000026395 | Ptprc   | protein tyrosine phosphatase, receptor type, C                                           |
| 10494761 | 242122 | ENSMUSG000000051076 | Vtcn1   | V-set domain containing T cell activation inhibitor 1                                    |
| 10576911 | 13642  | ENSMUSG000000001300 | Efnb2   | ephrin B2                                                                                |
| 10413928 | 69069  | ENSMUSG000000041707 | Tmem273 | transmembrane protein 273                                                                |
| 10351509 | 246256 | ENSMUSG000000059089 | Fcgr4   | Fc receptor, IgG, low affinity IV                                                        |
| 10359034 | 104009 | ENSMUSG000000033684 | Qsox1   | quiescin Q6 sulfhydryl oxidase 1                                                         |
| 10583056 | 17381  | ENSMUSG000000049723 | Mmp12   | matrix metalloproteinase 12                                                              |

|          |        |                     |           |                                                              |
|----------|--------|---------------------|-----------|--------------------------------------------------------------|
| 10539739 | 67855  | ENSMUSG00000033508  | Asprv1    | aspartic peptidase, retroviral-like 1                        |
| 10437210 | 56175  | ENSMUSG00000040605  | Bace2     | beta-site APP-cleaving enzyme 2                              |
| 10519951 | 212167 | ENSMUSG00000039934  | Gsap      | gamma-secretase activating protein                           |
| 10404422 | 20708  | ENSMUSG00000042842  | Serpinb6b | serine (or cysteine) peptidase inhibitor, clade B, member 6b |
| 10526783 | 381680 | ENSMUSG00000047592  | Nxpe5     | neurexophilin and PC-esterase domain family, member 5        |
| 10352756 | 226856 | ENSMUSG00000026623  | Lpgat1    | lysophosphatidylglycerol acyltransferase 1                   |
| 10571467 | 68797  | ENSMUSG00000031595  | Pdgfrl    | platelet-derived growth factor receptor-like                 |
| 10466200 | 109225 | ENSMUSG00000024672  | Ms4a7     | membrane-spanning 4-domains, subfamily A, member 7           |
| 10545168 | 56753  | ENSMUSG00000051397  | Tacstd2   | tumor-associated calcium signal transducer 2                 |
| 10474437 | 68201  | ENSMUSG00000027160  | Ccdc34    | coiled-coil domain containing 34                             |
| 10365991 | 13516  | ENSMUSG00000019936  | Epyc      | epiphycan                                                    |
| 10402268 | 19141  | ENSMUSG00000021190  | Lgmn      | legumain                                                     |
| 10430006 | 72027  | ENSMUSG00000063354  | Slc39a4   | solute carrier family 39 (zinc transporter), member 4        |
| 10545569 | 19695  | ENSMUSG00000030017  | Reg3g     | regenerating islet-derived 3 gamma                           |
| 10517165 | 23833  | ENSMUSG00000000682  | Cd52      | CD52 antigen                                                 |
| 10547657 | 12267  | ENSMUSG00000040552  | C3ar1     | complement component 3a receptor 1                           |
| 10472538 | 241452 | ENSMUSG00000027068  | Dhrs9     | dehydrogenase/reductase (SDR family) member 9                |
| 10435930 | 271375 | ENSMUSG000000090176 | Cd200r2   | Cd200 receptor 2                                             |
| 10561047 | 232983 | ENSMUSG00000060188  | Cxcl17    | chemokine (C-X-C motif) ligand 17                            |
| 10457640 | 20195  | ENSMUSG00000027907  | S100a11   | S100 calcium binding protein A11                             |
| 10466210 | 68774  | ENSMUSG00000024679  | Ms4a6d    | membrane-spanning 4-domains, subfamily A, member 6D          |
| 10375065 | 268396 | ENSMUSG00000040711  | Sh3pxd2b  | SH3 and PX domains 2B                                        |
| 10529824 | 19126  | ENSMUSG00000029086  | Prom1     | prominin 1                                                   |
| 10428955 | 331063 | ENSMUSG00000056293  | Gsdmc2    | gasdermin C2                                                 |
| 10476545 | 228677 | ENSMUSG00000039092  | Sptlc3    | serine palmitoyltransferase, long chain base subunit 3       |
| 10425092 | 72318  | ENSMUSG00000018008  | Cyth4     | cytohesin 4                                                  |
| 10401109 | 14776  | ENSMUSG00000042808  | Gpx2      | glutathione peroxidase 2                                     |
| 10429029 | 11514  | ENSMUSG00000022376  | Adcy8     | adenylate cyclase 8                                          |
| 10519324 | 12571  | ENSMUSG00000040274  | Cdk6      | cyclin-dependent kinase 6                                    |
| 10464251 | 226255 | ENSMUSG00000054843  | Atrnl1    | attractin like 1                                             |
| 10517508 | 12260  | ENSMUSG00000036905  | C1qb      | complement component 1, q subcomponent, beta polypeptide     |
| 10375145 | 16822  | ENSMUSG00000002699  | Lcp2      | lymphocyte cytosolic protein 2                               |
| 10508663 | 16792  | ENSMUSG00000028581  | Laptm5    | lysosomal-associated protein transmembrane 5                 |

|          |        |                    |                   |                                                                                       |
|----------|--------|--------------------|-------------------|---------------------------------------------------------------------------------------|
| 10510129 | 20148  | ENSMUSG00000066026 | Dhrs3             | dehydrogenase/reductase (SDR family) member 3                                         |
| 10389143 | 276950 | ENSMUSG00000035208 | Slfn8             | schlafen 8                                                                            |
| 10425161 | 16852  | ENSMUSG00000068220 | Lgals1            | lectin, galactose binding, soluble 1                                                  |
| 10496324 | 67547  | ENSMUSG00000053897 | Slc39a8           | solute carrier family 39 (metal ion transporter), member 8                            |
| 10488973 | 74562  | ENSMUSG00000013338 | Fer1l4            | fer-1-like 4 (C. elegans)                                                             |
| 10414065 | 11752  | ENSMUSG00000021950 | Anxa8             | annexin A8                                                                            |
| 10417212 | 223272 | ENSMUSG00000032925 | Itgbl1            | integrin, beta-like 1                                                                 |
| 10412100 | 26401  | ENSMUSG00000021754 | Map3k1            | mitogen-activated protein kinase kinase kinase 1                                      |
| 10356271 | 381287 | ENSMUSG00000089844 | A530032D15R<br>ik | RIKEN cDNA A530032D15Rik gene                                                         |
| 10379636 | 20558  | ENSMUSG00000000204 | Slfn4             | schlafen 4                                                                            |
| 10545101 | 54486  | ENSMUSG00000029919 | Hpgds             | hematopoietic prostaglandin D synthase                                                |
| 10372648 | 17105  | ENSMUSG00000069516 | Lyz2              | lysozyme 2                                                                            |
| 10398665 | 21928  | ENSMUSG00000021281 | Tnfaip2           | tumor necrosis factor, alpha-induced protein 2                                        |
| 10398907 | 104759 | ENSMUSG00000052160 | Pld4              | phospholipase D family, member 4                                                      |
| 10508465 | 17357  | ENSMUSG00000047945 | Marcksl1          | MARCKS-like 1                                                                         |
| 10404913 | 67252  | ENSMUSG00000021373 | Cap2              | CAP, adenylate cyclase-associated protein, 2 (yeast)                                  |
| 10502240 | 114249 | ENSMUSG00000040998 | Npnt              | nephronectin                                                                          |
| 10574259 | 14766  | ENSMUSG00000031785 | Adgrg1            | adhesion G protein-coupled receptor G1                                                |
| 10582162 | 72042  | ENSMUSG00000031827 | Cotl1             | coactosin-like 1 (Dictyostelium)                                                      |
| 10444291 | 14961  | ENSMUSG00000073421 | H2-Ab1            | histocompatibility 2, class II antigen A, beta 1                                      |
| 10512999 | 381524 | ENSMUSG00000086712 | Mexis             | macrophage expressed LXRA(NR1H3)-dependent amplifier of Abca1 transcription<br>lncRNA |
| 10435937 | 74603  | ENSMUSG00000036172 | Cd200r3           | CD200 receptor 3                                                                      |
| 10389214 | 20308  | ENSMUSG00000019122 | Ccl9              | chemokine (C-C motif) ligand 9                                                        |
| 10378216 | 53313  | ENSMUSG00000020788 | Atp2a3            | ATPase, Ca++ transporting, ubiquitous                                                 |
| 10439249 | 547253 | ENSMUSG00000034422 | Parp14            | poly (ADP-ribose) polymerase family, member 14                                        |
| 10495675 | 14066  | ENSMUSG00000028128 | F3                | coagulation factor III                                                                |
| 10379633 | 20555  | ENSMUSG00000078763 | Slfn1             | schlafen 1                                                                            |
| 10429528 | 76486  | ENSMUSG00000044678 | Ly6k              | lymphocyte antigen 6 complex, locus K                                                 |
| 10570957 | 20377  | ENSMUSG00000031548 | Sfrp1             | secreted frizzled-related protein 1                                                   |
| 10564818 | 16790  | ENSMUSG00000039062 | Anpep             | alanyl (membrane) aminopeptidase                                                      |
| 10534862 | 18542  | ENSMUSG00000029718 | Pcolce            | procollagen C-endopeptidase enhancer protein                                          |

|          |        |                    |             |                                                              |
|----------|--------|--------------------|-------------|--------------------------------------------------------------|
| 10561187 | 12587  | ENSMUSG00000089661 | Mia         | MIA SH3 domain containing                                    |
| 10366446 | 216350 | ENSMUSG00000034127 | Tspan8      | tetraspanin 8                                                |
| 10570855 | 18791  | ENSMUSG00000031538 | Plat        | plasminogen activator, tissue                                |
| 10574149 | 434341 | ENSMUSG00000074151 | Nlrc5       | NLR family, CARD domain containing 5                         |
| 10450344 | 12263  | ENSMUSG00000024371 | C2          | complement component 2 (within H-2S)                         |
| 10467258 | 226101 | ENSMUSG00000048612 | Myof        | myoferlin                                                    |
| 10541564 | 73149  | ENSMUSG00000043832 | Clec4a3     | C-type lectin domain family 4, member a3                     |
| 10441244 | 52793  | ENSMUSG00000022938 | Fam3b       | FAM3 metabolism regulating signaling molecule B              |
| 10544660 | 71720  | ENSMUSG00000029822 | Osbpl3      | oxysterol binding protein-like 3                             |
| 10456071 | 12978  | ENSMUSG00000024621 | Csf1r       | colony stimulating factor 1 receptor                         |
| 10450374 | 110956 | NA                 | D17H6S56E-5 | DNA segment, Chr 17, human D6S56E 5                          |
| 10514347 | 12579  | ENSMUSG00000073802 | Cdkn2b      | cyclin dependent kinase inhibitor 2B                         |
| 10398075 | 20716  | ENSMUSG00000021091 | Serpina3n   | serine (or cysteine) peptidase inhibitor, clade A, member 3N |
| 10571312 | 319520 | ENSMUSG00000031530 | Dusp4       | dual specificity phosphatase 4                               |
| 10595211 | 12816  | ENSMUSG00000032332 | Col12a1     | collagen, type XII, alpha 1                                  |
| 10538253 | 56524  | ENSMUSG00000038388 | Pals2       | protein associated with LIN7 2, MAGUK family member          |
| 10567580 | 80719  | ENSMUSG00000035004 | Igsf6       | immunoglobulin superfamily, member 6                         |
| 10528332 | 242864 | ENSMUSG00000044968 | Napepld     | N-acyl phosphatidylethanolamine phospholipase D              |
| 10542911 | 209086 | ENSMUSG00000047735 | Samd9l      | sterile alpha motif domain containing 9-like                 |
| 10403834 | 20379  | ENSMUSG00000021319 | Sfrp4       | secreted frizzled-related protein 4                          |
| 10558961 | 64540  | ENSMUSG00000025511 | Tspan4      | tetraspanin 4                                                |
| 10548879 | 17313  | ENSMUSG00000030218 | Mgp         | matrix Gla protein                                           |
| 10391052 | 16664  | ENSMUSG00000045545 | Krt14       | keratin 14                                                   |
| 10380862 | 19049  | ENSMUSG00000061718 | Ppp1r1b     | protein phosphatase 1, regulatory inhibitor subunit 1B       |
| 10416837 | 16365  | ENSMUSG00000022126 | Acod1       | aconitate decarboxylase 1                                    |
| 10443494 | 74116  | ENSMUSG00000024011 | Pi16        | peptidase inhibitor 16                                       |
| 10444244 | 21354  | ENSMUSG00000037321 | Tap1        | transporter 1, ATP-binding cassette, sub-family B (MDR/TAP)  |
| 10420488 | 219132 | ENSMUSG00000068245 | Phf11d      | PHD finger protein 11D                                       |
| 10472235 | 76747  | ENSMUSG00000026989 | Dapl1       | death associated protein-like 1                              |
| 10351658 | 12506  | ENSMUSG00000015355 | Cd48        | CD48 antigen                                                 |
| 10481627 | 16819  | ENSMUSG00000026822 | Lcn2        | lipocalin 2                                                  |
| 10357660 | 213006 | ENSMUSG00000059149 | Mfsd4a      | major facilitator superfamily domain containing 4A           |
